# Supplementary material
Source: PubMed Central journal article supplement (PMC3397258)
Supplement: mmc1.pdf [file mmc1.pdf]

## Supplemental Data

### Presence of Multiple Independent Effects in Risk

### Loci of Common Complex Human Diseases

Xiayi Ke

**Table S1. List of RA, CD, T1D, and T2D Loci Being Investigated in the Study**

| Chr       | Locus                                    | SNPs with $p \leq 5 \times 10^{-8}$ | SNPs with $p \leq 2.3 \times 10^{-6}$ | Reported SNPs with p Values in the Samples                  | References |
|-----------|------------------------------------------|-------------------------------------|---------------------------------------|-------------------------------------------------------------|------------|
| <b>RA</b> |                                          |                                     |                                       |                                                             |            |
| 1         | CD247 [MIM 186780]                       | 0                                   | 0                                     | rs840016 (0.0045)                                           | 1          |
| 1         | MMEL1-TNFRSF14 [MIM 602746]              | 15                                  | 26                                    | rs3890745 ( $2.34 \times 10^{-6}$ )                         | 1          |
| 1         | POU3F1 [MIM 602479]                      | 0                                   | 0                                     | rs12131057 ( $9.6 \times 10^{-11}$ )                        | 1          |
| 1         | PTPN22 [MIM 600716]                      | 12                                  | 16                                    | rs2476601 ( $1.56 \times 10^{-28}$ )                        | 1          |
| 2         | AFF3 [MIM 601464]                        | 0                                   | 0                                     | rs11676922 ( $2.91 \times 10^{-3}$ )                        | 1          |
| 2         | CTLA4 [MIM 123890]                       | 0                                   | 0                                     | rs3087243 (0.082)                                           | 1          |
| 2         | REL [MIM 164910]                         | 0                                   | 0                                     | rs13031237 (0.36)                                           | 1          |
| 2         | SPRED2 [MIM 609292]                      | 0                                   | 0                                     | rs934734 (0.094)                                            | 1          |
| 2         | STAT4 [MIM 600558]                       | 0                                   | 0                                     | rs7574865 (0.049)                                           | 1          |
| 3         | PXK [MIM 611450]                         | 0                                   | 0                                     | rs13315591 (0.027)                                          | 1          |
| 4         | IL2[MIM 147680]-IL21 [MIM 605185]        | 0                                   | 1                                     | rs13119723 (0.0065)                                         | 1          |
| 5         | C5orf30                                  | 0                                   | 0                                     | rs26232 (0.00062)                                           | 1          |
| 5         | ANKRD55 -IL6ST [MIM 600694]              | 0                                   | 0                                     | rs6859219 (0.015)                                           | 1          |
| 6         | CCR6 [MIM 601835]                        | 0                                   | 0                                     | rs3093023 (0.027)                                           | 1          |
| 6         | OLIG3 [MIM 609323] -TNFAIP3 [MIM 191163] | 0                                   | 6                                     | rs6920220 ( $8.91 \times 10^{-7}$ ),<br>rs10499194 (0.0042) | 2-3        |
| 7         | CDK6 [MIM 603368]                        | 0                                   | 0                                     | rs42041 (0.00082)                                           | 4          |
| 7         | IRF5 [MIM 607218]                        | 0                                   | 1                                     | rs10488631 ( $4.9 \times 10^{-6}$ )                         | 1          |
| 8         | BLK [MIM 191305]                         | 0                                   | 0                                     | rs2736340 (0.0080)                                          | 5          |
| 9         | CCL21 [MIM 602737]                       | 0                                   | 0                                     | rs951005 (0.20)                                             | 1          |
| 9         | TRAF1 [MIM 601711]-C5 [MIM 120900]       | 0                                   | 0                                     | rs3761847 (0.86)                                            | 1          |
| 10        | IL2RA [MIM 147730]                       | 0                                   | 6                                     | rs706778 ( $8.90 \times 10^{-6}$ )                          | 1          |
| 10        | PRKCQ [MIM 600448]                       | 0                                   | 0                                     | rs4750316 (0.00028)                                         | 1          |
| 12        | KIF5A [MIM 602821]                       | 1                                   | 6                                     | rs1678542 ( $1.31 \times 10^{-6}$ )                         | 4          |
| 12        | SH2B3 [MIM 300017]                       | 0                                   | 0                                     | rs3184504 (0.11)                                            | 1          |
| 14        | BATF [MIM 612476]                        | 0                                   | 0                                     | rs7155603 (0.066)                                           | 1          |
| 17        | IKZF3 [MIM 606221]                       | 0                                   | 0                                     | rs2872507 (0.54)                                            | 1          |
| 20        | CD40 [MIM 109535]                        | 0                                   | 0                                     | rs4810485 (0.13)                                            | 1          |
| 21        | UBASH3A [MIM 605736]                     | 0                                   | 0                                     | rs11203203 (0.16)                                           | 1          |
| <b>CD</b> |                                          |                                     |                                       |                                                             |            |
| 1         | IL23R [MIM 607562]                       | 47                                  | 55                                    | rs11465804 ( $5.9 \times 10^{-22}$ )                        | 6          |
| 1         | ITLN1 [MIM 609873]                       | 0                                   | 6                                     | rs2274910 ( $4.84 \times 10^{-6}$ )                         | 7          |

|            |                                                         |     |     |                                     |    |
|------------|---------------------------------------------------------|-----|-----|-------------------------------------|----|
| 1          | PTPN22 [MIM 600716]                                     | 0   | 0   | rs2476601 (0.0052)                  | 7  |
| 1          | SCAMP3 [MIM 606913]-MUC1 [MIM 158340]                   | 0   | 0   | rs3180018 (0.14)                    | 8  |
| 2          | ATG16L1 [MIM 610767]                                    | 42  | 48  | rs3828309 (3.88x10 <sup>-14</sup> ) | 7  |
| 2          | THADA [MIM 611800]                                      | 0   | 0   | rs10495903 (0.0066)                 | 8  |
| 3          | MST1 [MIM 142408]                                       | 1   | 3   | rs3197999 (4.43x10 <sup>-7</sup> )  | 7  |
| 5          | IL12B [MIM 161561]                                      | 0   | 6   | rs10045431 (4.52x10 <sup>-7</sup> ) | 7  |
| 5          | IRGM [MIM 608212]                                       | 0   | 64  | rs11747270 (1.28x10 <sup>-7</sup> ) | 7  |
| 5          | PTGER4 [MIM 601586]                                     | 196 | 221 | rs4613763 (1.08x10 <sup>-15</sup> ) | 7  |
| 6          | CCR6 [MIM 601835]                                       | 0   | 0   | rs2301436 (0.0011)                  | 7  |
| 6          | CDKAL1[MIM 611259]                                      | 0   | 1   | rs6908425 (1.30x10 <sup>-5</sup> )  | 7  |
| 6          | PRDM1 [MIM 603423]                                      | 0   | 0   | rs6568421 (7.09x10 <sup>-5</sup> )  | 7  |
| 9          | JAK2 [MIM 147796]                                       | 0   | 0   | rs10758669 (2.92x10 <sup>-6</sup> ) | 7  |
| 9          | TNFSF15 [MIM 604052]                                    | 0   | 1   | rs4263839 (4.76x10 <sup>-6</sup> )  | 7  |
| 10         | NKX2-3 [MIM 606727]                                     | 7   | 9   | rs11190140 (8.52x10 <sup>-9</sup> ) | 7  |
| 10         | ZNF365 [MIM 607818]                                     | 0   | 1   | rs10995271 (2.47x10 <sup>-7</sup> ) | 7  |
| 11         | C11orf30                                                | 0   | 0   | rs7927894 (1.21x10 <sup>-5</sup> )  | 7  |
| 11         | NELL1 [MIM 602319]                                      | 0   | 0   | rs1793004 (0.0019)                  | 8  |
| 12         | LRRK2 [MIM 609007]-MUC19 [MIM 612170]                   | 0   | 1   | rs11175593 (0.00046)                | 7  |
| 14         | GALC [MIM 606890]-GPR65 [MIM 604620]                    | 2   | 10  | rs8005161 (2.18x10 <sup>-5</sup> )  | 8  |
| 14         | ZFP36L1 [MIM 601064]                                    | 0   | 0   | rs4902642 (0.049)                   | 8  |
| 16         | NOD2 [MIM 605956]                                       | 22  | 36  | rs2076756 (8.25x10 <sup>-18</sup> ) | 8  |
| 17         | ORMDL3 [MIM 610075]                                     | 0   | 0   | rs2872507 (0.0036)                  | 7  |
| 17         | STAT3 [MIM 102582]                                      | 0   | 0   | rs744166 (2.75x10 <sup>-5</sup> )   | 7  |
| 18         | PTPN2 [MIM 176887]                                      | 37  | 37  | rs2542151 (1.90x10 <sup>-9</sup> )  | 7  |
| 19         | FUT2 [MIM 182100]                                       | 0   | 0   | rs504963 (3.32x10 <sup>-19</sup> )  | 6  |
| 19         | TYK2 [MIM 176941]-ICMA1 [MIM 147840]-ICAM3 [MIM 146631] | 0   | 0   | rs12720356 (1.92x10 <sup>-9</sup> ) | 8  |
| 21         | ICOSLG [MIM 605717]                                     | 0   | 0   | rs762421 (2.93x10 <sup>-5</sup> )   | 7  |
| <b>T1D</b> |                                                         |     |     |                                     |    |
| 1          | IL10 [MIM 124092]                                       | 0   | 0   | rs3024505 (0.0037)                  | 9  |
| 1          | PGM1 [MIM 171900]                                       | 5   | 26  | rs2269241 (6.52x10 <sup>-8</sup> )  | 9  |
| 1          | PTPN22 [MIM 600716]                                     | 13  | 15  | rs2476601 (3.91x10 <sup>-25</sup> ) | 9  |
| 2          | AFF3 [MIM 601464]                                       | 1   | 8   | rs9653442 (2.28x10 <sup>-5</sup> )  | 10 |
| 2          | CTLA4 [MIM 123890]                                      | 0   | 0   | rs3087243 (8.19x10 <sup>-6</sup> )  | 9  |
| 2          | IFIH1 [MIM 606951]                                      | 0   | 0   | rs1990760 (1.16x10 <sup>-5</sup> )  | 9  |
| 4          | IL2 [MIM 147680]                                        | 0   | 5   | rs4505848 (4.92x10 <sup>-6</sup> )  | 9  |
| 5          | CAPSL                                                   | 0   | 1   | rs1445898 (0.0001)                  | 10 |
| 6          | BACH2 [MIM 605394]                                      | 0   | 0   | rs11755527 (0.00051)                | 9  |
| 6          | C6orf173                                                | 0   | 0   | rs9388489 (0.0037)                  | 9  |
| 7          | COBL [MIM 610317]                                       | 0   | 0   | rs4948088 (0.0058)                  | 9  |
| 9          | GLIS3 [MIM 610192]                                      | 0   | 0   | rs7020673 (0.00095)                 | 9  |
| 10         | C10orf59                                                | 0   | 0   | rs10509540 (0.0086)                 | 9  |
| 10         | IL2RA [MIM 147730]                                      | 12  | 22  | rs12251307 (4.53x10 <sup>-6</sup> ) | 9  |
| 10         | PRKCQ [MIM 600448]                                      | 0   | 0   | rs11258747 (0.12)                   | 9  |
| 11         | INS [MIM 176730]                                        | 0   | 0   | rs7111341 (3.67x10 <sup>-12</sup> ) | 9  |
| 12         | C12orf30                                                | 0   | 3   | rs17696736 (1.7x10 <sup>-15</sup> ) | 11 |
| 12         | CD69 [MIM 107273]                                       | 0   | 1   | rs4763879 (0.0028)                  | 9  |
| 12         | ERBB3 [MIM 164870]                                      | 8   | 8   | rs2292239 (2.13x10 <sup>-12</sup> ) | 9  |
| 12         | SH2B3 [MIM 300017]                                      | 4   | 20  | rs3184504 (0.0011)                  | 9  |
| 14         | DLK1 [MIM 176290]-MEG3 [MIM                             | 0   | 0   | rs941576 (3.47x10 <sup>-5</sup> )   | 12 |

|            |                                                         |    |    |                                                             |    |
|------------|---------------------------------------------------------|----|----|-------------------------------------------------------------|----|
|            | 605636]-RTL1 [MIM 611896]-DIO3 [MIM 601038]             |    |    |                                                             |    |
| 15         | CTSH [MIM 116820]                                       | 0  | 0  | rs3825932 (0.00081)                                         | 9  |
| 16         | C16orf75-PRM3-TNP2 [MIM 190232]                         | 0  | 0  | rs416603 (0.00018)                                          | 11 |
| 16         | CLEC16A [MIM 611303]                                    | 44 | 63 | rs12708716 ( $1.04 \times 10^{-8}$ )                        | 9  |
| 16         | IL27 [MIM 608273]                                       | 0  | 0  | rs4788084 ( $1.97 \times 10^{-12}$ )                        | 9  |
| 18         | CD226 [MIM 605397]                                      | 0  | 0  | rs763361 (0.005)                                            | 10 |
| 18         | PTPN2 [MIM 176887]                                      | 0  | 20 | rs1893217 ( $8.90 \times 10^{-8}$ )                         | 9  |
| 19         | TYK2 [MIM 176941]-ICMA1 [MIM 147840]-ICAM3 [MIM 146631] | 0  | 0  | rs2304256 ( $2.56 \times 10^{-11}$ )                        | 12 |
| 21         | UBASH3A [MIM 605736]                                    | 0  | 0  | rs11203203 (0.0022)                                         | 9  |
| 22         | C1QTNF6                                                 | 0  | 0  | rs229541 (0.0001)                                           | 9  |
| <b>T2D</b> |                                                         |    |    |                                                             |    |
| 1          | NOTCH2[MIM 600275]-ADAM30 [MIM 604779]                  | 0  | 0  | rs10923931 (0.13)                                           | 13 |
| 2          | BCL11A [MIM 606557]                                     | 0  | 0  | rs243021 ( $6.83 \times 10^{-5}$ )                          | 14 |
| 2          | IRS1 [MIM 147545]                                       | 0  | 0  | rs7578326 (0.0092)                                          | 14 |
| 2          | RBMS1 [MIM 602310]-ITGB6 [MIM 147558]                   | 2  | 19 | rs7593730 ( $2.78 \times 10^{-6}$ )                         | 15 |
| 2          | THADA [MIM 611800]                                      | 0  | 0  | rs7578597 (0.0075)                                          | 13 |
| 3          | ADAMTS9 [MIM 605421]                                    | 0  | 0  | rs4607103 (0.014)                                           | 13 |
| 3          | IGF2BP2 [MIM 608289]                                    | 0  | 0  | rs1470579 ( $2.78 \times 10^{-6}$ )                         | 14 |
| 3          | PPARG [MIM 601487]-SYN2 [MIM 600755]                    | 0  | 1  | rs13081389 (0.0028),<br>rs17036101 (0.0018)                 | 14 |
| 4          | WFS1 [MIM 606201]                                       | 0  | 0  | rs1801214 (0.0069)                                          | 14 |
| 5          | ZBED3                                                   | 0  | 0  | rs4457053 (0.0092)                                          | 14 |
| 6          | CDKAL1[MIM 611259]                                      | 11 | 54 | rs10440833 ( $8.3 \times 10^{-11}$ )                        | 14 |
| 7          | JAZF1 [MIM 606246]                                      | 0  | 1  | rs849134 ( $1.32 \times 10^{-5}$ )                          | 14 |
| 7          | KLF14 [MIM 609393]                                      | 0  | 0  | rs972283 (0.00033)                                          | 14 |
| 8          | SLC30A8 [MIM 611145]                                    | 0  | 0  | rs3802177 (0.62)                                            | 14 |
| 8          | TP53INP1 [MIM 606185]                                   | 0  | 0  | rs896854 (0.0025)                                           | 14 |
| 9          | CDKN2A [MIM 600160]-CDKN2B [MIM 600431]                 | 0  | 4  | rs10965250 ( $6.8 \times 10^{-8}$ ),<br>rs7020996 (0.00019) | 14 |
| 10         | CDC123-CAMK1D [MIM 607957]                              | 0  | 0  | rs12779790 (0.020)                                          | 13 |
| 10         | IDE [MIM 146680]                                        | 0  | 1  | rs5015480 (0.00055)                                         | 14 |
| 10         | TCF7L2 [MIM 602228]                                     | 52 | 57 | rs7903146 ( $1.04 \times 10^{-18}$ )                        | 14 |
| 11         | CENTD2 [MIM 606646]                                     | 0  | 0  | rs1552224 (0.020)                                           | 14 |
| 11         | KCNJ11 [MIM 600937]                                     | 0  | 0  | rs5219 (0.0037)                                             | 16 |
| 11         | KCNQ1 [MIM 607542]                                      | 0  | 0  | rs231362 (0.41)                                             | 14 |
| 12         | DCD [MIM 606634]                                        | 0  | 0  | rs1153188 (0.0078)                                          | 13 |
| 12         | HMGGA2 [MIM 600698]                                     | 0  | 0  | rs1531343 (0.075)                                           | 14 |
| 12         | HNF1A [MIM 142410]                                      | 0  | 0  | rs7967197 (0.00072)                                         | 14 |
| 12         | TSPAN8 [MIM 600769]-LGR5 [MIM 606667]                   | 6  | 15 | rs4760790 ( $1.64 \times 10^{-7}$ )                         | 14 |
| 15         | PRC1 [MIM 603484]                                       | 0  | 0  | rs8042680 (0.017)                                           | 14 |
| 15         | ZFAND6 (MIM 610183)                                     | 0  | 0  | rs11634397 (0.0053)                                         | 14 |
| 16         | FTO [MIM 610966]                                        | 82 | 90 | rs11642841 ( $7.3 \times 10^{-10}$ )                        | 14 |
| 17         | HNF1B (MIM 189907)                                      | 0  | 0  | rs4430796 (0.0015)                                          | 14 |

Only SNPs with imputation information scores (in both cases and controls)  $\geq 0.90$ ,  $MAF \geq 5\%$  were included, except for SNPs whose associations were reported and confirmed in the literature.

## References

1. Stahl EA, Raychaudhuri S, Remmers EF, et al. (2010). Genome-wide association study meta-analysis identifies seven new rheumatoid arthritis risk loci. *Nat Genet.* 42(6): 508-514.
2. Thomson W, Barton A, Ke X, Eyre, et al. (2007). Rheumatoid arthritis association at 6q23. *Nat Genet.* 39(12): 1431-1433.
3. Plenge RM, Cotsapas C, Davies L, Price AL, de Bakker PI, Maller J, Pe'er I, Burtt NP, Blumenstiel B, DeFelice M, et al. (2007). Two independent alleles at 6q23 associated with risk of rheumatoid arthritis. *Nat Genet.* 39(12):1477-1482.
4. Raychaudhuri S, Thomson BP, Remmers EF, Eyre S, Hinks A, Guiducci C, Catanese JJ, Xie G, Stahl EA, Chen R, et al. (2009). Genetic variants at CD28, PRDM1 and CD2/CD58 are associated with rheumatoid arthritis risk. *Nat Genet.* 41(12):1313-1318.
5. Gregersen PK, Amos CI, Lee AT, Lu Y, Remmers EF, Kastner DL, Seldin MF, Criswell LA, Plenge RM, Holers VM, et al. (2009). REL, encoding a member of the NF-kappaB family of transcription factors, is a newly defined risk locus for rheumatoid arthritis. *Nat Genet.* 41(7):820-823.
6. McGovern DP, Jones MR, Taylor KD, Marcianti K, Yan X, Dubinsky M, Ippoliti A, Vasiliauskas E, Berel D, Derkowski C, et al. (2010). Fucosyltransferase 2 (FUT2) non-sector status is associated with Crohn's disease. *Hum Mol Genet.* 19(17):3468-3476.
7. Barrett, J.C., Hansoul, S., Nicolae, D.L., Cho, J.H., Duerr, R.H., Rioux, J.D., Brant, S.R., Silverberg, M.S., Taylor, K.D., Barmada, M.M., et al; (2008). Genome-wide association defines more than 30 distinct susceptibility loci for Crohn's disease. *Nat. Genet.* 40, 955–962.
8. Franke, A., McGovern, D.P., Barrett, J.C., Wang, K., Radford-Smith, G.L., Ahmad, T., Lees, C.W., Balschun, T., Lee, J., Roberts, R., et al. (2010). Genome-wide meta-analysis increases to 71 the number of confirmed Crohn's disease susceptibility loci. *Nat. Genet.* 42, 1118–1125.
9. Barrett JC, Clayton DG, Concannon P, Akolkar B, Cooper JD, Erlich HA, Julier C, Morahan G, Nerup J, Nierras C., et al (2009). Genome-wide association study and meta-analysis find that over 40 loci affect type 1 diabetes. *Nat Genet.* 41(6):703-707.
10. Todd JA, Walker NM, Cooper JD, Smyth DJ, Downes K, Plagnol V, Bailey R, Nejentsev S, Field SF, Payne F, et al. (2007). Robust associations of four new chromosome regions from genome-wide analyses of type 1 diabetes. *Nat Genet.* 39(7):857-864.
11. Cooper JD, Smyth DJ, Smiles AM, Plagnol V, Walker NM, Allen JE, Downes K, Barrett JC, Healy BC, Mychaleckyj JC., et al. (2008). Meta-analysis of genome-wide association data identifies additional type 1 diabetes risk loci. *Nat Genet.* 40(12):1399-1401.
12. Wallace C, Smith DJ, Maisuria-Armer M, Walker NM, Todd JA, Clayton DG. (2010). The imprinted DLK1-MEG3 gene region on chromosome 14q32.2 alters susceptibility loci to type 1 diabetes. *Nat Genet.* 42(1): 68-71.
13. Zeggini E, Scott LJ, Saxena R, Voight BF, Marchini JL, Hu T, de Bakker PI, Abecasis GR, Almgren P, Andersen G, et al. (2008). Meta-analysis of genome-wide association data and large-scale replication identifies additional susceptibility loci for type 2 diabetes. *Nat Genet.* 40(5):638-645.
14. Voight BF, Scott LJ, Steinthorsdottir V, Morris AP, Dina C, Welch RP, Zeggini E, Huth C, Aulchenko YS, Thorleifsson G, et al. (2010). Twelve type 2 diabetes susceptibility loci identified through large-scale association analysis. *Nat Genet.* 42(7):579-589.
15. Qi L, Cornelis MC, Kraft P, Stanya KJ, Linda Kao WH, Pankow JS, Dupuis J, Florez JC, Fox CS, Paré G, et al. (2010). Diabetes Genetics Replication and Meta-analysis (DIAGRAM) Consortium. Genetic variants at 2q24 are associated with susceptibility to type 2 diabetes. *Hum Mol Genet.* 19(13):2706-15.
16. Scott LJ, Mohlke KL, Bonnycastle LL, Willer CJ, Li Y, Duren WL, Erdos MR, Stringham HM, Chines PS, Jackson AU, et al. (2007). A genome-wide association study of type 2 diabetes in Finns detects multiple susceptibility variants. *Science.* 316(5829):1341-1345.
